# Supplementary material for: BcsZ inhibits biofilm phenotypes and promotes virulence by blocking cellulose production in Salmonella enterica serovar Typhimurium
Source: PubMed Central journal article supplement (PMC5070118; doi:10.1186/s12934-016-0576-6), 2016-10-19
Supplement: 12934_2016_576_MOESM1_ESM.pdf [file 12934_2016_576_MOESM1_ESM.pdf]

**Additional file 1:** Strains and plasmids used in this study.

| Strain or plasmid                      | Description                                                                                                                                                                                                                                                    | Reference/ Source   |
|----------------------------------------|----------------------------------------------------------------------------------------------------------------------------------------------------------------------------------------------------------------------------------------------------------------|---------------------|
| <b><i>E. coli</i> K-12</b>             |                                                                                                                                                                                                                                                                |                     |
| DH5 $\alpha$                           | $\lambda\phi 80$ <i>lacZ</i> $\Delta$ M15 $\Delta$ ( <i>lacZYA-argF</i> )U169<br><i>recA1 endA1 hsdR17</i> (r <sub>K</sub> <sup>-</sup> m <sub>K</sub> <sup>-</sup> ) <i>supE44 thi-1</i><br><i>gyrA relA1</i>                                                 | New England Biolabs |
| TOP10                                  | F- <i>mcrA</i> $\Delta$ ( <i>mrr-hsdRMS-mcrBC</i> )<br>$\phi 80$ <i>lacZ</i> $\Delta$ M15 $\Delta$ <i>lacX74 nupG recA1</i><br><i>araD139</i> $\Delta$ ( <i>ara-leu</i> )7697 <i>galE15 galK16</i><br><i>rpsL</i> (Str <sup>R</sup> ) <i>endA1</i> $\lambda^-$ | Invitrogen          |
| <b><i>S. Typhimurium</i> ATCC14028</b> |                                                                                                                                                                                                                                                                |                     |
| UMR1                                   | ATCC14028 Nal <sup>r</sup> , cellulose <sub>28°C</sub> , curli<br>fimbriae <sub>28°C</sub>                                                                                                                                                                     | [1]                 |
| MAE5                                   | UMR1 $\Delta$ <i>csgA101</i>                                                                                                                                                                                                                                   | [1]                 |
| MAE14                                  | UMR1 $\Delta$ <i>csgBA101::Km<sup>r</sup></i> , cellulose <sub>28°C</sub>                                                                                                                                                                                      | [2]                 |
| MAE50                                  | UMR1 $\Delta$ <i>csgD101</i>                                                                                                                                                                                                                                   | [2]                 |
| MAE97                                  | UMR1 <i>pcsgD1</i> $\Delta$ <i>csgBA102</i> , cellulose <sub>28/37°C</sub>                                                                                                                                                                                     | [2]                 |
| MAE98                                  | UMR1 $\Delta$ <i>bcsZ101::tetRA</i>                                                                                                                                                                                                                            | This study          |
| MAE99                                  | MAE14 $\Delta$ <i>bcsZ101::tetRA</i>                                                                                                                                                                                                                           | This study          |

|         |                                            |            |
|---------|--------------------------------------------|------------|
| MAE108  | <i>ΔfliC::Cm ΔfljB</i>                     | [3]        |
| MAE155  | UMR1 <i>pcsgD1 ΔbcsC101::MudJ</i>          | [4]        |
| MAE222  | UMR1 <i>ΔbcsA101::MudJ</i>                 | [4]        |
| MAE224  | UMR1 <i>ΔbcsZ101::Cm</i>                   | This study |
| MAE1254 | MAE97 <i>ΔbcsZ101::tetRA</i>               | This study |
| MAE1263 | MAE97 BcsZE56A                             | This study |
| MAE1267 | UMR1 <i>ΔbcsA::GT2PilZ::tetRA</i>          | This study |
| MAE1473 | <i>ΔflhDC::Cm</i>                          | [5]        |
| MAE1766 | <i>ΔmotA::Cm</i>                           | [5]        |
| MAE1873 | UMR1 <i>bcsC-3xFLAG</i>                    | This study |
| MAE1900 | UMR1 <i>ΔcsgD101 ΔbcsZ101::tetRA</i>       | This study |
| MAE1903 | UMR1 <i>ΔbcsZ101::tetRA ΔbcsA101::MudJ</i> | This study |
| MAE2124 | UMR1 <i>ΔbcsC101::MudJ</i>                 | This study |
| MAE2125 | UMR1 <i>ΔbcsZ101::tetRA bcsC-3xFLAG</i>    | This study |
| MAE2126 | MAE14 <i>ΔbcsZ101::Cm</i>                  | This study |
| MAE2127 | MAE5 <i>ΔbcsC101::MudJ</i>                 | This study |

---

### Plasmids

|        |                                                 |     |
|--------|-------------------------------------------------|-----|
| pBAD30 | pACYC184 ori; L-arabinose regulated <i>araC</i> | [6] |
|--------|-------------------------------------------------|-----|

---

|                       |                                                                                           |                     |
|-----------------------|-------------------------------------------------------------------------------------------|---------------------|
|                       | P <sub>BAD</sub> promoter; Amp <sup>r</sup>                                               |                     |
| pKD3                  | FRT-cat-FRT; Cm <sup>r</sup> , Amp <sup>r</sup>                                           | [7]                 |
| pKD46                 | P <sub>araB</sub> αβγ; Amp <sup>r</sup>                                                   | [7]                 |
| pSUB11                | 3xFLAG-Km <sup>r</sup>                                                                    | [8]                 |
| pSRKTc                | pBBR1 ori, <i>lacI<sup>q</sup></i> , <i>PlacZ</i> , Tet <sup>r</sup>                      | [9]                 |
| pACYC184              | pACYC ori; Tet <sup>r</sup>                                                               | New England Biolabs |
| pBcsZ                 | <i>bcsZ</i> cloned in <i>SacI/SphI</i> site in pBAD30<br>with a 8x His-Tag                | This study          |
| pBcsZ <sub>E56A</sub> | <i>bcsZ<sub>E56A</sub></i> cloned in <i>SacI/SphI</i> site in pBAD30<br>with a 8x His-Tag | This study          |

---

<sup>1</sup>, American Type Culture Collection.

## References

1. Römling, U., et al., *Curli fibers are highly conserved between Salmonella typhimurium and Escherichia coli with respect to operon structure and regulation.* J Bacteriol, 1998. **180**(3): p. 722-31.
2. Romling, U., et al., *AgfD, the checkpoint of multicellular and aggregative behaviour in Salmonella typhimurium regulates at least two independent pathways.* Mol Microbiol, 2000. **36**(1): p. 10-23.
3. Rochon, M. and U. Romling, *Flagellin in combination with curli fimbriae elicits an immune response in the gastrointestinal epithelial cell line HT-29.* Microbes Infect, 2006. **8**(8): p. 2027-33.
4. Zogaj, X., et al., *The multicellular morphotypes of Salmonella typhimurium and Escherichia coli produce cellulose as the second component of the extracellular matrix.* Mol Microbiol, 2001. **39**(6): p. 1452-63.

5. Ahmad, I., et al., *The EAL-like protein STM1697 regulates virulence phenotypes, motility and biofilm formation in Salmonella typhimurium*. *Mol Microbiol*, 2013. **90**(6): p. 1216-32.
6. Guzman, L.M., et al., *Tight regulation, modulation, and high-level expression by vectors containing the arabinose PBAD promoter*. *J Bacteriol*, 1995. **177**(14): p. 4121-30.
7. Datsenko, K.A. and B.L. Wanner, *One-step inactivation of chromosomal genes in Escherichia coli K-12 using PCR products*. *Proc Natl Acad Sci U S A*, 2000. **97**(12): p. 6640-5.
8. Uzzau, S., et al., *Epitope tagging of chromosomal genes in Salmonella*. *Proc Natl Acad Sci U S A*, 2001. **98**(26): p. 15264-9.
9. Khan, S.R., et al., *Broad-host-range expression vectors with tightly regulated promoters and their use to examine the influence of TraR and TraM expression on Ti plasmid quorum sensing*. *Appl Environ Microbiol*, 2008. **74**(16): p. 5053-62.
