# Supplementary material for: BcsZ inhibits biofilm phenotypes and promotes virulence by blocking cellulose production in Salmonella enterica serovar Typhimurium
Source: PubMed Central journal article supplement (PMC5070118; doi:10.1186/s12934-016-0576-6), 2016-10-19
Supplement: 12934_2016_576_MOESM2_ESM.pdf [file 12934_2016_576_MOESM2_ESM.pdf]

**Additional file 2:** Primers used in this study

| Primer                                         | Sequence                                                                    |
|------------------------------------------------|-----------------------------------------------------------------------------|
| Cloning of <i>bcsZ</i> into pBAD30             |                                                                             |
| BcsZclon_N                                     | ACAGCGCTCAAGGAGGGTAACATATGATGACTATGCTGCGCGGA<br>TGG                         |
| BcsZclon_C                                     | CAGACGCATGCTTAATGGTGGTGATGATGGTGATGGTGACGTGA<br>ACTTACGCATTCTGGCCCCGTCAG    |
| Site-directed mutagenesis BcsZ <sub>E56A</sub> |                                                                             |
| BcsZNE56A                                      | CAGGGACGCGTTATCGATCCGGGCGATGCGCGAAAAATTACCAC<br>CTCCGCAGGG                  |
| BcsZCE56A                                      | CTGTCGCTGCACGGCCTGGGCGTCGCGATTTTGCAGGAAAGGCAG<br>TAAGGC                     |
| <i>bcsZ</i> flanking primers                   |                                                                             |
| BcsZup                                         | TGCTGGCGGTACTGGCGGCCCTCAGTGTGG                                              |
| BcsZdown                                       | GTCGCTGCGCCGGCAAGCGGTGTTAGCG                                                |
| Construction of $\Delta bcsZ::tetRA$           |                                                                             |
| BcsZ-TetRA                                     | CAGGGACGCGTTATCGATCCGGGCGATGCGCAAAAATTACCACC<br>TCCTTAAGACCCACTTTCACATTTAAG |
| BcsZC-TetRA                                    | CTGTCGCTGCACGGCCTGGGCGCGATTTTGCAGGAAAGGCAGTA                                |

|                                     |                                                                  |
|-------------------------------------|------------------------------------------------------------------|
|                                     | ACTAAGCACTTGTCTCCTGTTTACTC                                       |
| Construction of $\Delta bcsZ::Cm$   |                                                                  |
| BcsZ-CmDel-<br>Start                | ATGACTATGCTGCGCGGATGGATAACGATGCTCGTCATGCGTGTA<br>GGCTGGAGCTGCTTC |
| BcsZ-CmDel-<br>Stop                 | TTAACGTGAACTTACGCATTCCTGGCCCCAGTCAGGTAATCATAT<br>GAATATCCTCCTTAG |
| Control primers $\Delta bcsZ::Cm$   |                                                                  |
| Cm inside                           | CTCCAGAGCGATGAAAACGT                                             |
| BcsZcontrol<br>Rev                  | CGGCAAAAAGCGTGCATGAGAC                                           |
| Control primers <i>bcsC</i> ::MudJ  |                                                                  |
| bcsC_200upstr<br>eam                | CCGGTCGGGTTTTCCGCCGCTTACTGCCT                                    |
| mudJ-<br>5primerc                   | TTATCGTGAAACGCTTTCGCGTTTTTCGTG                                   |
| Construction of <i>bcsC</i> -3XFLAG |                                                                  |
| BcsC3XFLAG<br>forw                  | GATTTACCGCCGCAGCCTCTGGTGCCTTACGCTGACTGGgactacaaag<br>accatgacgg  |
| BcsC3XFLAG<br>Rev                   | GCCTACGACGCCTGTCAATTCGTAGGCCTGACGCAATGAaatatgaatat<br>cctccttag  |

| Control primers <i>bcsC</i> -3XFLAG |                      |
|-------------------------------------|----------------------|
| bcsCintfw                           | CAGCGTACGGAAAACGGTC  |
| Km inside rv                        | GTTTCGCTTGGTGGTCGAAT |
