# Supplementary material for: BcsZ inhibits biofilm phenotypes and promotes virulence by blocking cellulose production in Salmonella enterica serovar Typhimurium
Source: PubMed Central journal article supplement (PMC5070118; doi:10.1186/s12934-016-0576-6), 2016-10-19

# Additional file 4

MAE97-VC

MAE97 $\Delta$ bcsZ-VC

MAE97 $\Delta$ bcsZ-pBcsZ

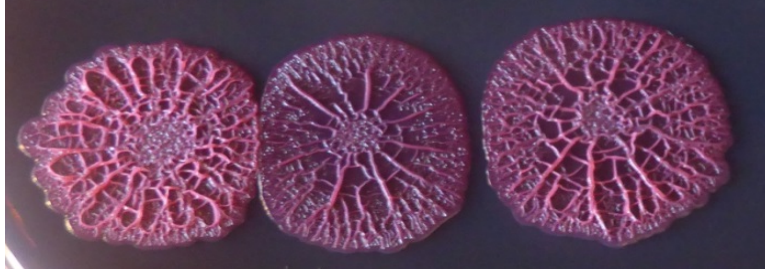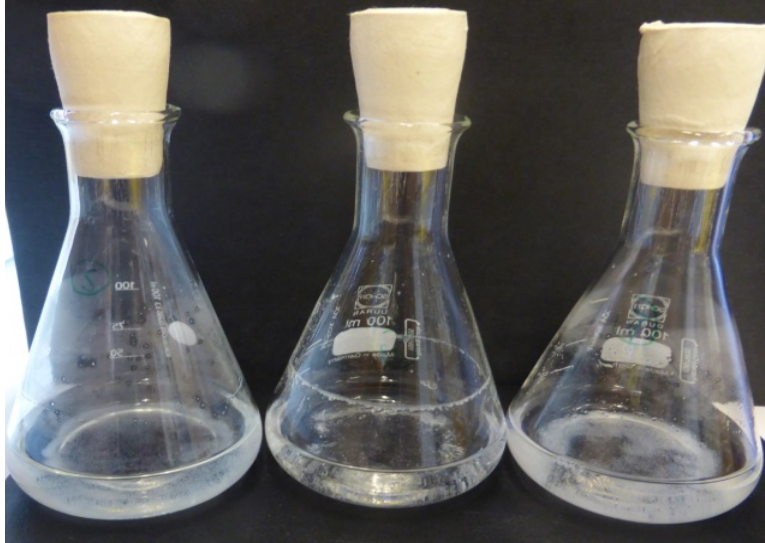

Supplement: 12934_2016_576_MOESM4_ESM.pdf [file 12934_2016_576_MOESM4_ESM.pdf]
