# Supplementary material for: BcsZ inhibits biofilm phenotypes and promotes virulence by blocking cellulose production in Salmonella enterica serovar Typhimurium
Source: PubMed Central journal article supplement (PMC5070118; doi:10.1186/s12934-016-0576-6), 2016-10-19

# Additional file 5

**A**

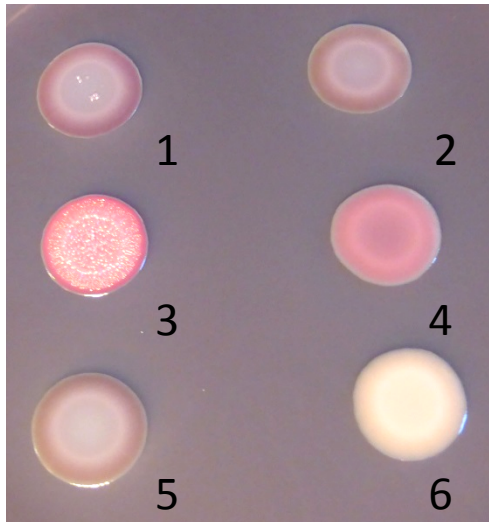

**B**

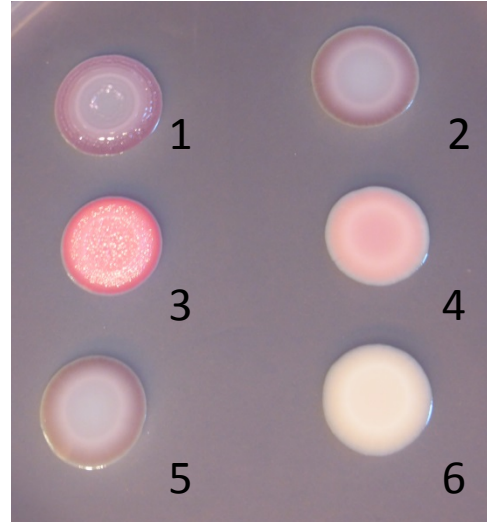

**C**

UMR1

UMR1  
*bcsC3xFLAG*

UMR1 $\Delta$ *bcsZ:tetRA*  
*bcsC3xFLAG*

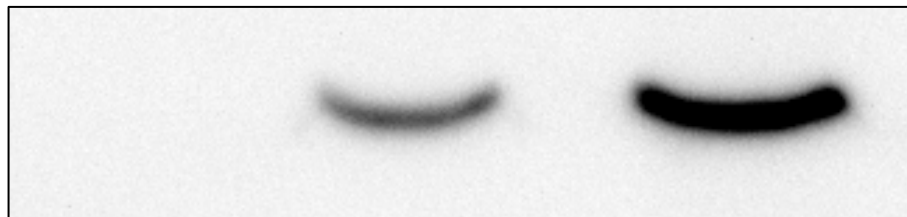

Supplement: 12934_2016_576_MOESM5_ESM.pdf [file 12934_2016_576_MOESM5_ESM.pdf]
