# Supplementary material for: BcsZ inhibits biofilm phenotypes and promotes virulence by blocking cellulose production in Salmonella enterica serovar Typhimurium
Source: PubMed Central journal article supplement (PMC5070118; doi:10.1186/s12934-016-0576-6), 2016-10-19
Supplement: 12934_2016_576_MOESM7_ESM.pdf [file 12934_2016_576_MOESM7_ESM.pdf]

# Additional file 7

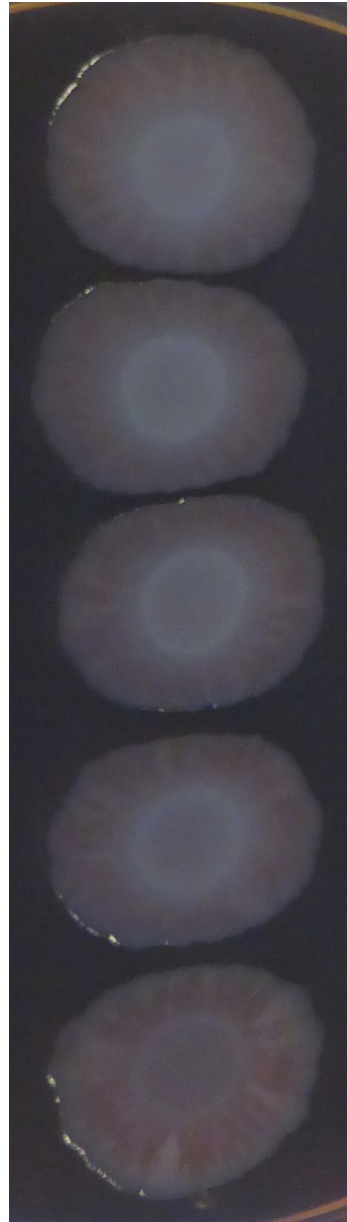

**$\Delta$ csgBA -VC**

**$\Delta$ csgBA  $\Delta$ bcsZ -VC**

**$\Delta$ csgBA  $\Delta$ bcsZ -pBcsZ**

**$\Delta$ csgBA  $\Delta$ bcsZ -pBcsZ<sub>E56A</sub>**

**$\Delta$ csgBA  $\Delta$ bcsA-VC**
