# Supplementary material for: BcsZ inhibits biofilm phenotypes and promotes virulence by blocking cellulose production in Salmonella enterica serovar Typhimurium
Source: PubMed Central journal article supplement (PMC5070118; doi:10.1186/s12934-016-0576-6), 2016-10-19

Additional  
file 10

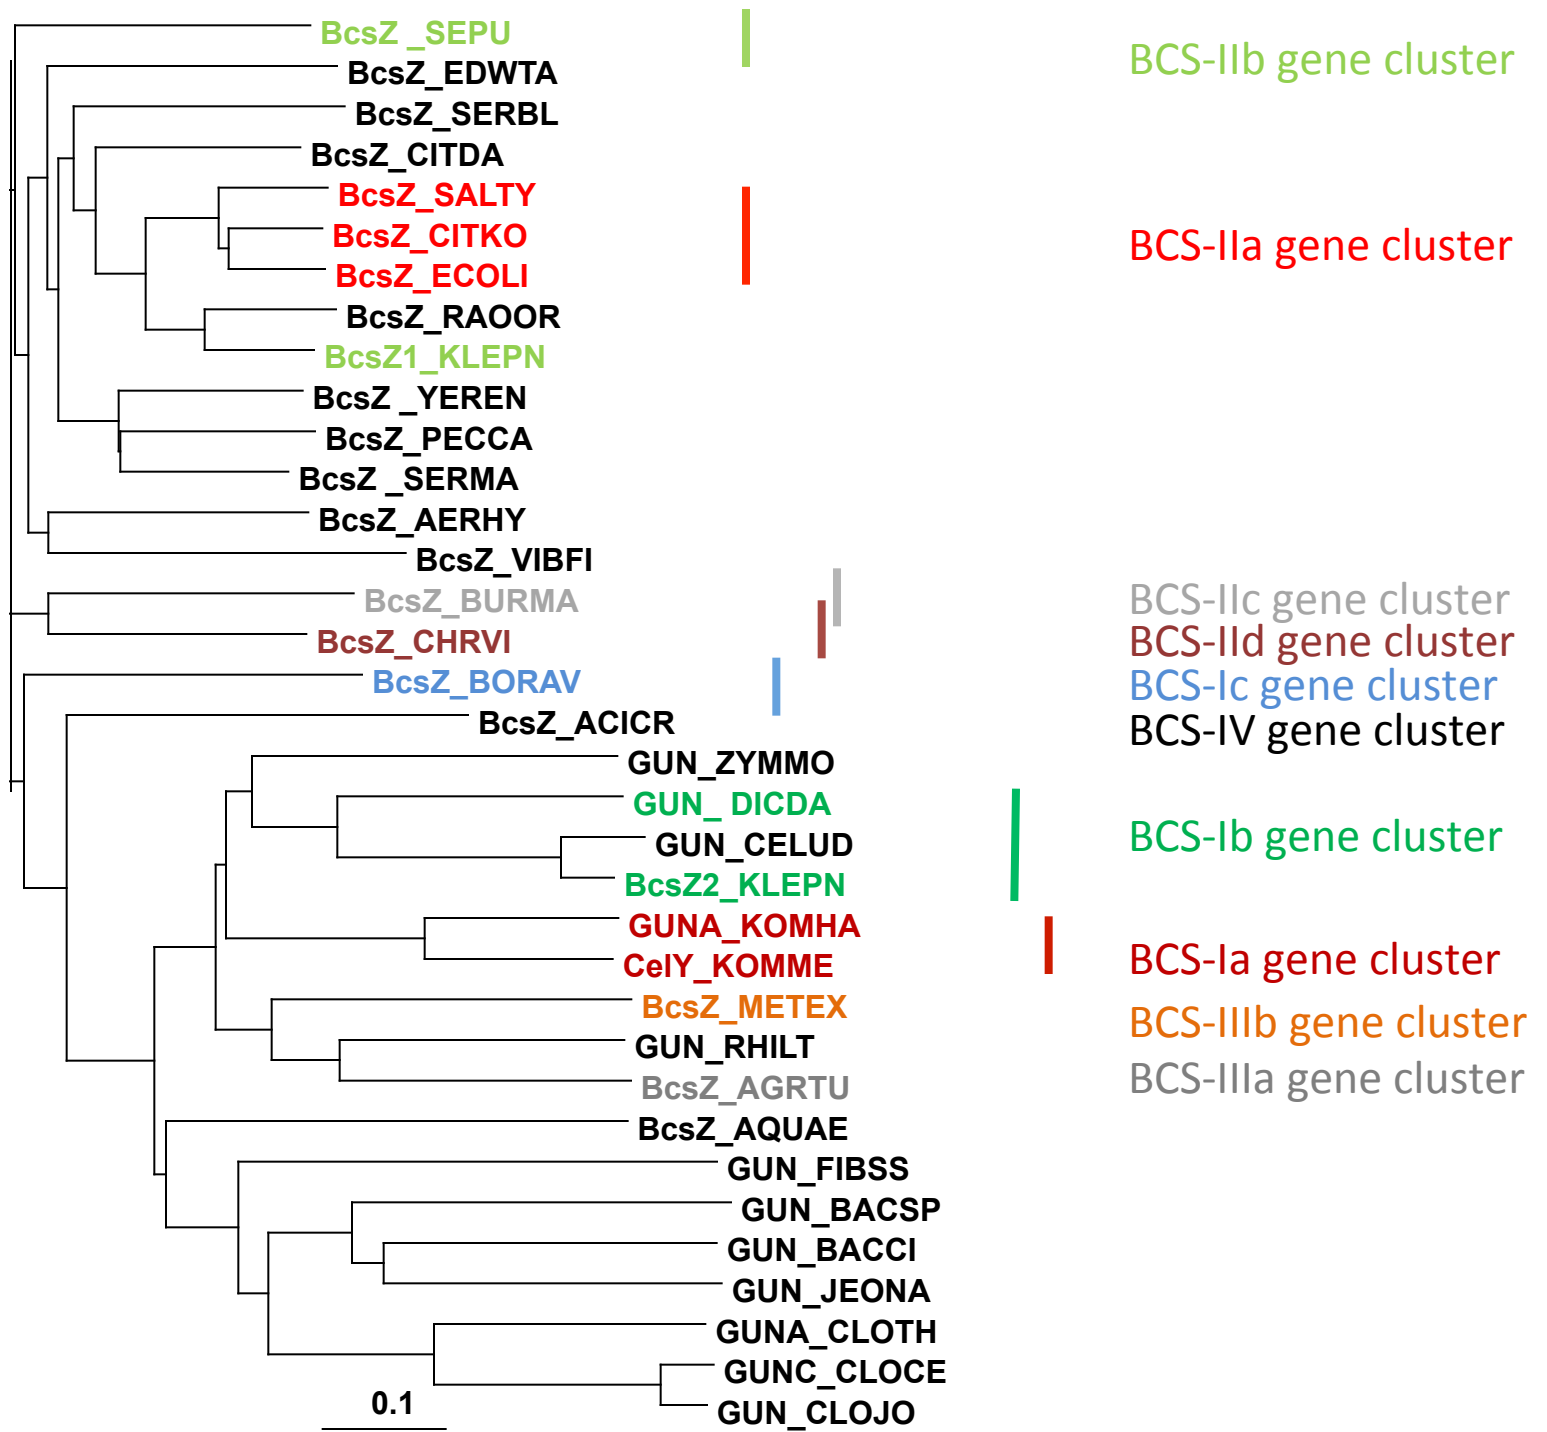

Supplement: 12934_2016_576_MOESM10_ESM.pdf [file 12934_2016_576_MOESM10_ESM.pdf]
